# Supplementary material
Source: publisher figshare collection journal article supplement (https://acs.figshare.com/ndownloader/files/3722014)
Supplement: Supplementary file 1 [file 3722014]

# Mutually-Reactive, Fluorogenic Hydrocyanine/Quinone Reporter Pairs for In- Solution Biosensing via Nanodroplet Association

*Rajarshi Chattaraj,<sup>§‡</sup> Praveena Mohan,<sup>‡‡</sup> Clare M. Livingston,<sup>‡</sup> Jeremy D. Besmer,<sup>‡</sup>*

*Kaushlendra Kumar,<sup>‡</sup> and Andrew P. Goodwin<sup>‡\*</sup>*

<sup>§</sup> Department of Mechanical Engineering, University of Colorado Boulder. Boulder, CO 80309.

<sup>‡</sup>Department of Chemical and Biological Engineering. University of Colorado Boulder. Boulder, CO 80303.

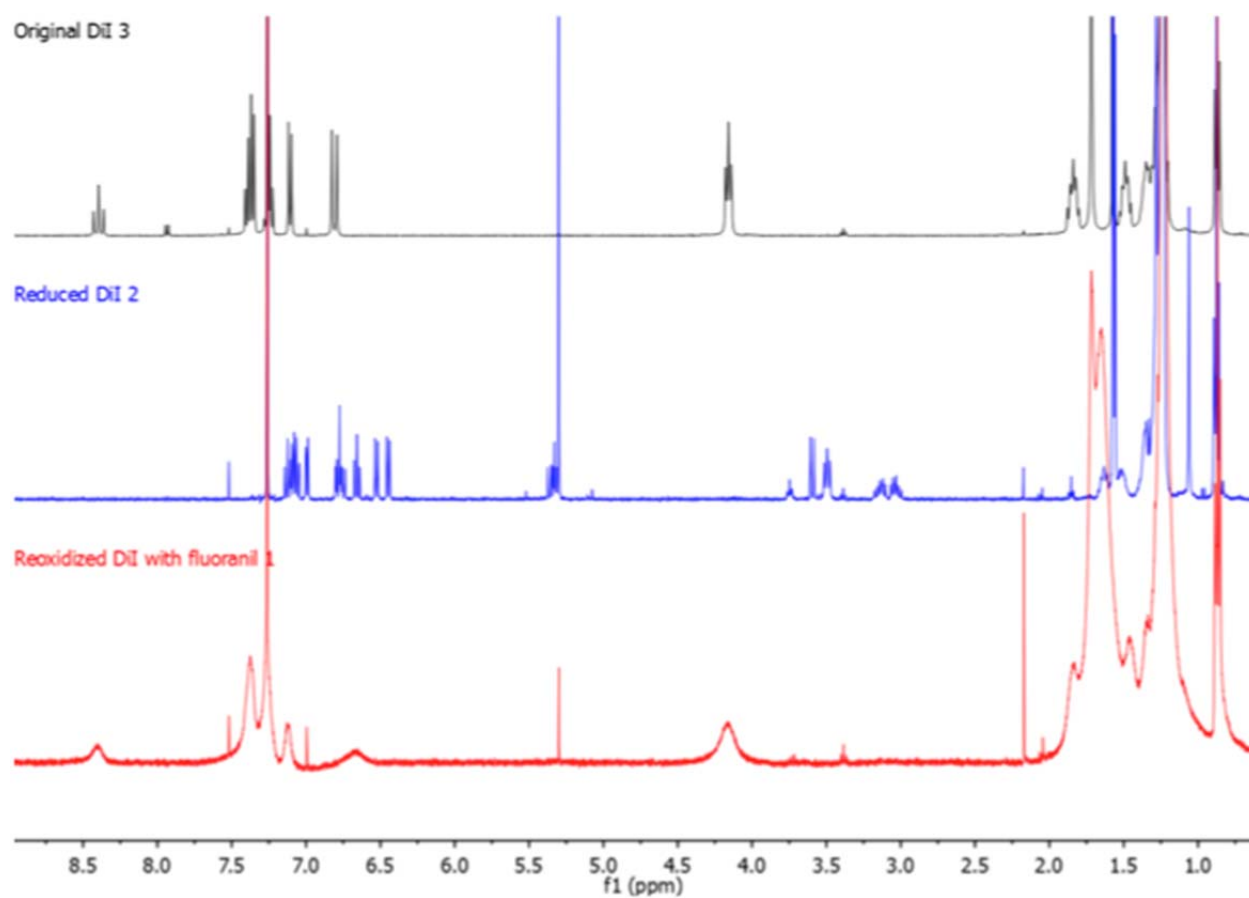

**Figure S1.** <sup>1</sup>H-NMR spectra (CDCl<sub>3</sub>) of DiI (*black*), HDiI(*blue*), and HDiI mixed with 4 molar equivalents of p-fluoraniI (*red*).

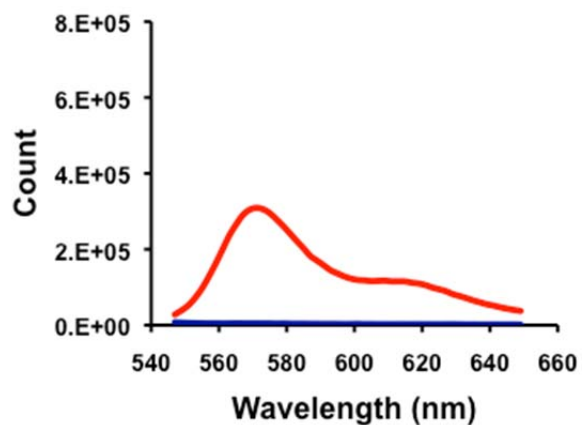

**Figure S2.** Fluorescence emission spectra ( $\lambda_{\text{exc}} = 532 \text{ nm}$ ) of HDiI mixed with 1 molar equivalent of p-fluoranol (*red*) in soybean oil, and HDiI only (*blue*) in soybean oil.

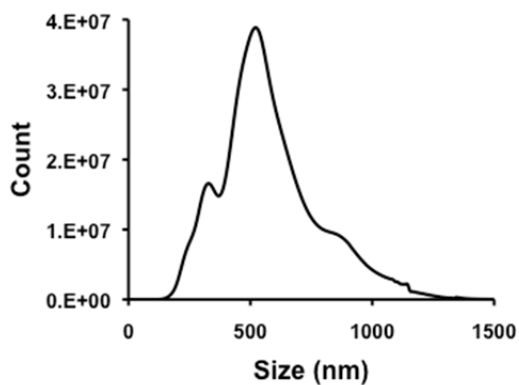

**Figure S3.** Size distribution of droplets containing NEOBEE oil as measured by NTA. Mean droplet diameter: 575.5 nm; SD = 203.5 nm.

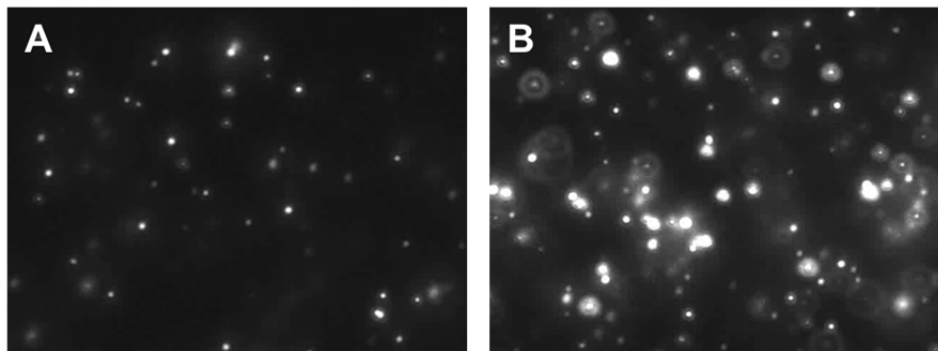

**Figure S4.** Representative frames of videos captured through a fluorescence filter under a 532 nm excitation laser, by the Malvern NanoSight LM10, for subsequent analysis by the NTA 3.0 software. Figures show fluorescence for biotinylated mixed HDiI droplets and p-Fluoranol droplets incubated without (**A**) and with (**B**) 1nM streptavidin.

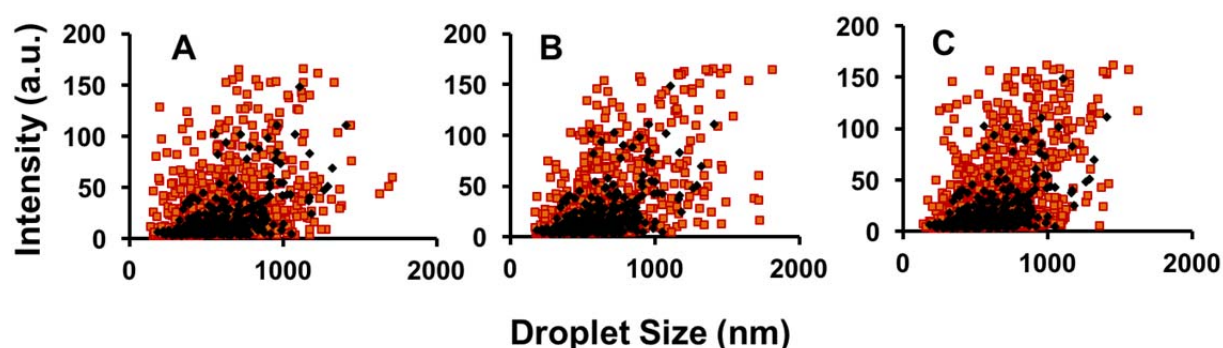

**Figure S5.** Representative NTA fluorescence scatter plots of biotinylated HDiI droplets and p-fluoranol droplets mixed without (black diamonds) or with (orange squares) a respective concentration of streptavidin (**A**: 1 pM; **B**: 100 pM; **C**: 1 nM)

| T-Test values                                  |            |  |  |                                                 |            |  |  |
|------------------------------------------------|------------|--|--|-------------------------------------------------|------------|--|--|
| ttest values between each STV conc and Control |            |  |  | ttest values between each VEGF conc and Control |            |  |  |
| <i>Figure 4C</i>                               |            |  |  | <i>Figure 6C</i>                                |            |  |  |
| Conc of stv                                    | p-value    |  |  | VEGF conc                                       | p-value    |  |  |
| 1.0E-13                                        | 0.00126337 |  |  | 1E-13                                           | 0.0106526  |  |  |
| 1.0E-12                                        | 0.00177514 |  |  | 1E-12                                           | 0.02369324 |  |  |
| 1.0E-10                                        | 0.0007076  |  |  | 1E-10                                           | 0.00210828 |  |  |
| 1.0E-09                                        | 0.00013669 |  |  | 1E-09                                           | 0.00037667 |  |  |
| 1.0E-08                                        | 0.00865701 |  |  |                                                 |            |  |  |

**Figure S6.** P-values calculated from one-tailed t-test for data in Figures 4C and 6C.
